# Supplementary material for: RNA Editing Enzyme ADAR1 Regulates METTL3 in an Editing Dependent Manner to Promote Breast Cancer Progression via METTL3/ARHGAP5/YTHDF1 Axis
Source: MDPI journal article supplement (doi:10.3390/ijms23179656), 2022-08-25
Supplement: s1 [file s1]

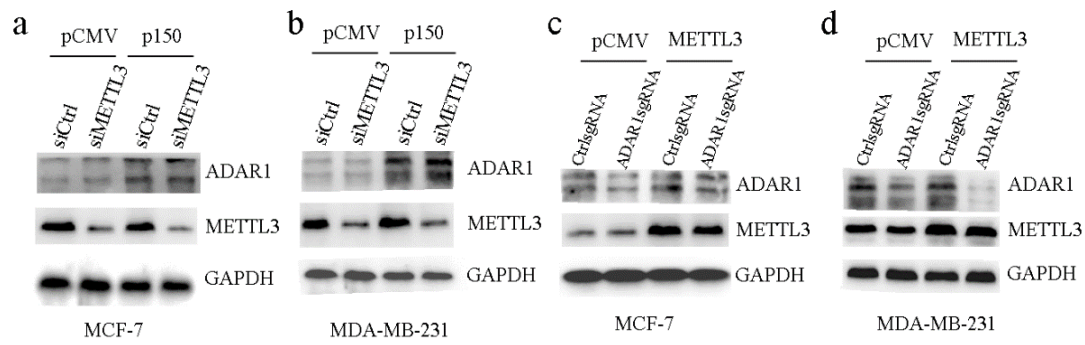

**Figure S1. Protein expression levels of ADAR1 and METTL3 in breast cancer cells transfected with or without siRNAs and plasmids described in Figure 3.**

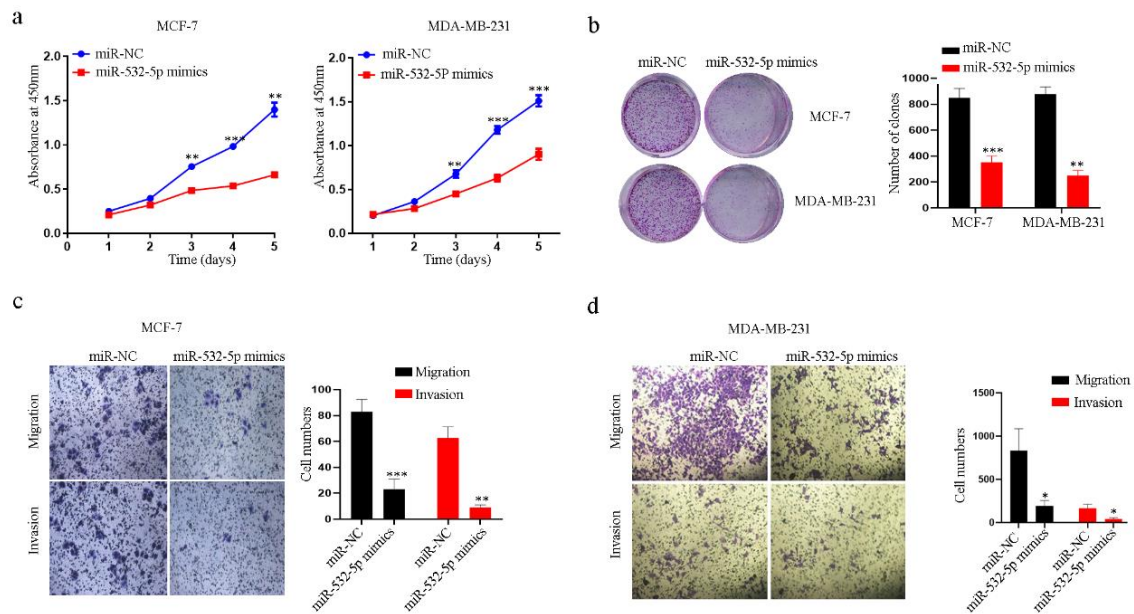

**Figure S2. miR-532-5p inhibits cell proliferation, colony formation, cell migration and invasion of breast cancer cell lines.**

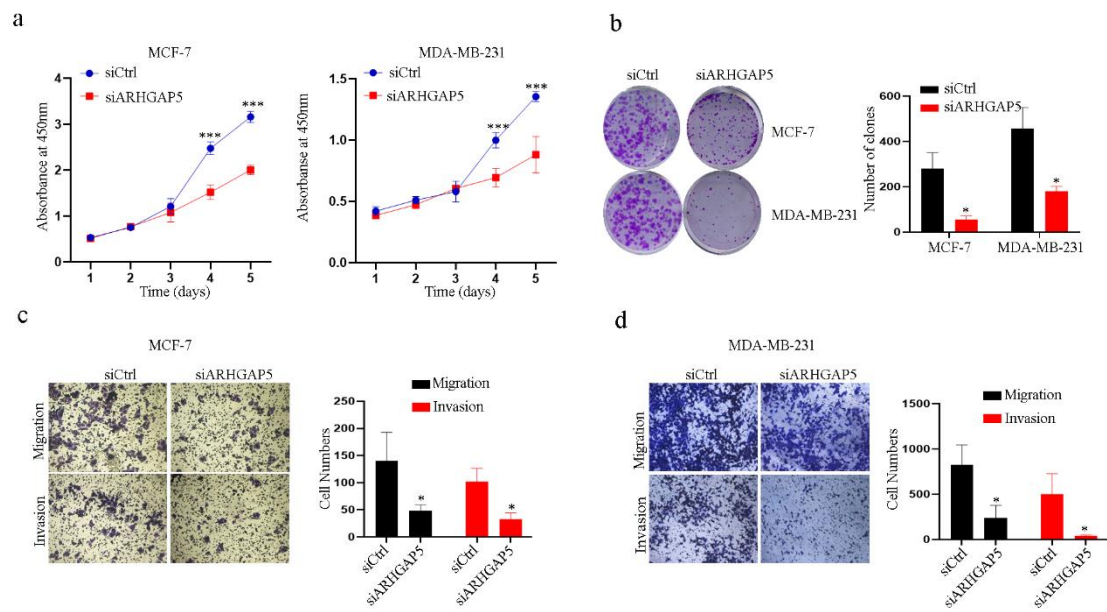

**Figure S3. Knockdown of ARHGAP5 inhibits cell proliferation, colony formation, cell migration and invasion of breast cancer cell lines.**

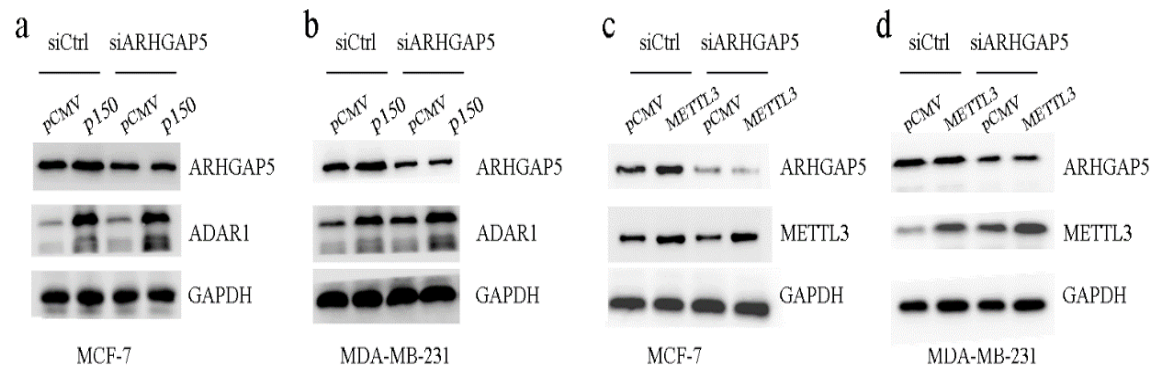

**Figure S4. Protein expression levels of ARHGAP5, ADAR1 and METTL3 in breast cancer cells transfected with or without siRNAs and plasmids described in Figure 6.**

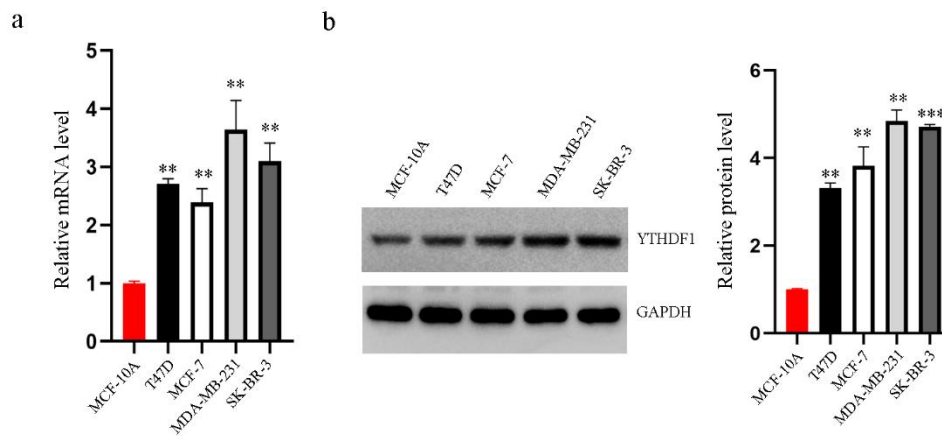

**Figure S5. YTHDF1 is highly expressed in breast cancer cell lines.**

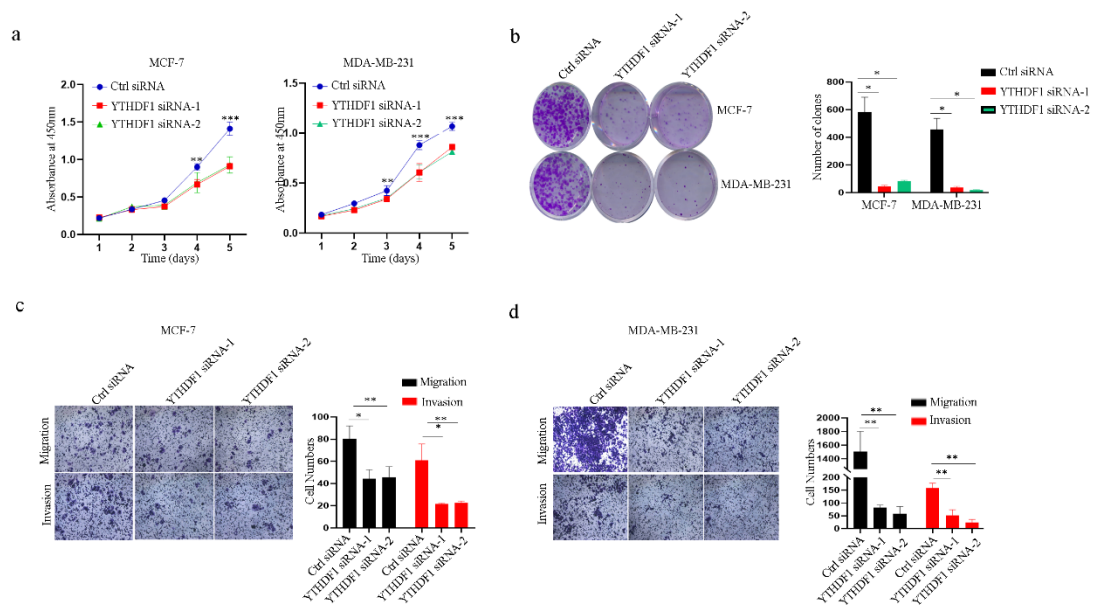

**Figure S6. Knockdown of YTHDF1 inhibits cell proliferation, colony formation, cell migration and invasion of breast cancer cell lines.**

**Table S1** Oligo sequence used in the experiments

| Oligo name                | Oligo sequence (5'→3')  |
|---------------------------|-------------------------|
| <b>siRNA target oligo</b> |                         |
| siYTHDF1-1                | GATACAGTTCATGACAATGA    |
| siYTHDF1-2                | GAAACGTCCAGCCTAATTCT    |
| siYTHDF2                  | GAACGTCAAGGTCGTGGGAAA   |
| siYTHDF3                  | TACGGCATATTCGCTTAGAAA   |
| siARHGAP5                 | AGAUCAUAAUAUCAUUCUATT   |
| siMETTL3                  | CUGCACUUCAGACGAAUUATT   |
| <b>PCR primers</b>        |                         |
| YTHDF1-F                  | ATGTCGGCCACCAGCGTGGACA  |
| YTHDF1-R                  | TCATTGTTTGTTTCGACTCTGC  |
| GAPDH-F                   | TCTTAAGAAGACGACGGCTTCAG |
| GAPDH-R                   | TTGCTCTCTCACTTGTCTCGAT  |
| ARHGAP5-F                 | AGGGAAGCTCAACGTAGATGG   |
| ARHGAP5-R                 | ATGATCCACGCATTCATCACAT  |
| ADAR1-F                   | CATCAGCGGGCTGTTAGAAT    |
| ADAR1-R                   | CTTGGCCACTTTCTTGCTTC    |
| METTL3-F                  | AGCCTTCTGAACCAACAGTCC   |
| METTL3-R                  | CCGACCTCGAGAGCGAAAT     |
